# Supplementary material for: Comparative Investigation of Raw and Processed Radix Polygoni Multiflori on the Treatment of Vascular Dementia by Liquid Chromatograph−Mass Spectrometry Based Metabolomic Approach
Source: MDPI journal article supplement (doi:10.3390/metabo12121297), 2022-12-19
Supplement: s1 [file s1]

## Supplementary Materials

### Analysis of PPM and RPM extract components

The samples of PPM and RPM extract were prepared by adding methanol at a concentration of 1 mg/ml. The samples were centrifuged at 12000 rpm for 15 min at 4°C. The supernatant was analyzed by LC-MS.

For LC-MS analysis, ultrahigh-performance liquid chromatography–quadrupole time-of-flight mass spectrometry (AB SCIEX Triple TOF 5600+, USA) equipped. The separation was performed by gradient elution using mobile phase A (0.1% formic acid) and mobile phase B (100% methanol). Separation was achieved on a Waters Atlantis™ Premier BEH C18 AX column (100 × 2.1 mm, 1.7 μm) at a flow rate of 0.3 mL/min with a gradient elution using 0.1% formic acid in water as mobile phase A and acetonitrile as mobile phase B. The flow rate was 0.3 mL/min, with an autosampler temperature of 4°C and an injection volume of 2 μL.

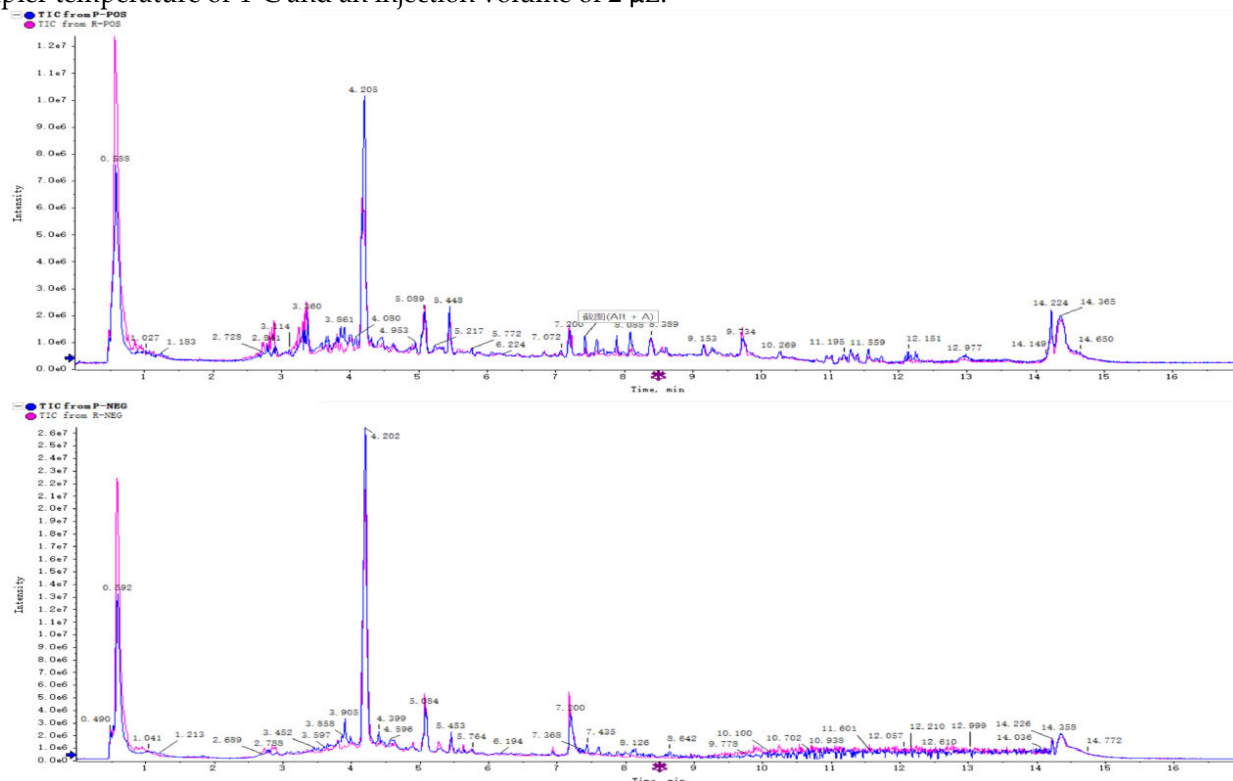

**Figure S1.** Total ion chromatogram of extract of PPM and RPM

By comparison with the database, a total of 29 compounds were identified in the extract of PPM, and 25 compounds were identified in the extract of RPM, as shown in Table S1, 2.

**Table S1.** Compounds assigned in extract of PPM.

| Component Name                                                      | Area     | RT (min) | Adduct / Charge                         | Formula                                        | Precursor Mass | Mass Error (ppm) |
|---------------------------------------------------------------------|----------|----------|-----------------------------------------|------------------------------------------------|----------------|------------------|
| Icaritin                                                            | 4.82E+04 | 0.56     | [M - H] <sup>-</sup>                    | C <sub>21</sub> H <sub>20</sub> O <sub>6</sub> | 367.1214       | 3.5              |
| 5,6,7,8-Tetrahydroxy-2-(4-hydroxy-3,5-dimethoxyphenyl)chromen-4-one | 4.81E+05 | 0.57     | [M + H <sub>2</sub> O + H] <sup>+</sup> | C <sub>17</sub> H <sub>14</sub> O <sub>9</sub> | 381.0793       | -4.4             |

|                                                                                                                                                                                             |          |      |                                         |                                                 |          |      |
|---------------------------------------------------------------------------------------------------------------------------------------------------------------------------------------------|----------|------|-----------------------------------------|-------------------------------------------------|----------|------|
| Butanedioic Acid                                                                                                                                                                            | 5.97E+03 | 0.60 | [M + H <sub>3</sub> N + H] <sup>+</sup> | C <sub>4</sub> H <sub>6</sub> O <sub>4</sub>    | 136.0617 | -3.2 |
| (-)-Catechin                                                                                                                                                                                | 8.83E+04 | 3.45 | [M - H] <sup>-</sup>                    | C <sub>15</sub> H <sub>14</sub> O <sub>6</sub>  | 289.0720 | 0.8  |
| Mulberroside A                                                                                                                                                                              | 1.61E+04 | 3.59 | [M - H <sub>2</sub> O + H] <sup>+</sup> | C <sub>26</sub> H <sub>32</sub> O <sub>14</sub> | 551.1749 | -2   |
| 2,5-Bis(Beta-D-Glucopyranosyloxy)-3,4'-Dihydroxys<br>tilbene                                                                                                                                | 1.20E+05 | 3.64 | [M - H] <sup>-</sup>                    | C <sub>26</sub> H <sub>32</sub> O <sub>14</sub> | 567.1723 | 2.6  |
| 3-(Hydroxymethyl)tyrosine<br>D-Glucose,                                                                                                                                                     | 1.25E+04 | 3.70 | [M - H] <sup>-</sup>                    | C <sub>10</sub> H <sub>13</sub> NO <sub>4</sub> | 210.0769 | -1.8 |
| 2-O-[2,4-dihydroxy-6-[2-(4-hydroxyphenyl)ethenyl]<br>phenyl]-                                                                                                                               | 2.31E+06 | 3.90 | [M - H] <sup>-</sup>                    | C <sub>20</sub> H <sub>22</sub> O <sub>9</sub>  | 405.1187 | -0.9 |
| 3-acetyl-7-methoxy-2-methyl-5-[(2S,3R,4S,5S,6R)-3,4,<br>5-trihydroxy-6-(hydroxymethyl)oxan-2-yl]oxynapht<br>halene-1,4-dione                                                                | 1.02E+05 | 3.94 | [M-H] <sup>-</sup>                      | C <sub>20</sub> H <sub>22</sub> O <sub>10</sub> | 421.1145 | 1.1  |
| (2S,3R,4R,5S,6R)-2-[5-hydroxy-3-[(E)-2-(4-hydroxyp<br>henyl)ethenyl]-2-[(2S,3R,4R,5S,6R)-3,4,5-trihydroxy-<br>6-(hydroxymethyl)oxan-2-yl]oxyphenoxy]-6-(hydro<br>xymethyl)oxane-3,4,5-triol | 7.45E+03 | 3.99 | [M - H] <sup>-</sup>                    | C <sub>26</sub> H <sub>32</sub> O <sub>14</sub> | 567.1720 | 0.2  |
| 3-Pyrrolidineacetic acid,<br>2-carboxy-4-(1-methylethenyl)-                                                                                                                                 | 1.39E+04 | 4.03 | [M - H] <sup>-</sup>                    | C <sub>10</sub> H <sub>15</sub> NO <sub>4</sub> | 212.0932 | 0.8  |
| 5-(4-Hydroxyphenyl)peroxybenzene-1,3-diol                                                                                                                                                   | 2.06E+04 | 4.13 | [M - H] <sup>-</sup>                    | C <sub>12</sub> H <sub>10</sub> O <sub>5</sub>  | 233.0460 | 1.5  |
| 2-Methoxystypandrone                                                                                                                                                                        | 6.18E+03 | 4.19 | [M - H] <sup>-</sup>                    | C <sub>14</sub> H <sub>12</sub> O <sub>5</sub>  | 259.0621 | 3.5  |
| 2,3,5,4'-Tetrahydroxystilbene 2-O-Beta-D-Glucoside                                                                                                                                          | 1.69E+06 | 4.20 | [M + H] <sup>+</sup>                    | C <sub>20</sub> H <sub>22</sub> O <sub>9</sub>  | 407.1334 | -0.9 |
| 2,3,5,4''-Tetrahydroxystilbene 2-O-glucopyranoside                                                                                                                                          | 1.17E+07 | 4.20 | [M-H] <sup>-</sup>                      | C <sub>20</sub> H <sub>22</sub> O <sub>9</sub>  | 405.1190 | -0.3 |
| Astringenin;trans-Piceatannol                                                                                                                                                               | 3.40E+04 | 4.20 | [M - H] <sup>-</sup>                    | C <sub>14</sub> H <sub>12</sub> O <sub>4</sub>  | 243.0667 | 1.3  |
| Flavosativaside                                                                                                                                                                             | 2.44E+04 | 4.67 | [M - H] <sup>-</sup>                    | C <sub>27</sub> H <sub>30</sub> O <sub>15</sub> | 593.1503 | -1.4 |
| Resveravine(R)                                                                                                                                                                              | 1.21E+04 | 4.85 | [M - H] <sup>-</sup>                    | C <sub>14</sub> H <sub>12</sub> O <sub>3</sub>  | 227.0724 | 4.1  |
| 7-hydroxy-4,5-dimethylchromen-2-one                                                                                                                                                         | 9.51E+04 | 4.87 | [M - H] <sup>-</sup>                    | C <sub>11</sub> H <sub>10</sub> O <sub>3</sub>  | 189.0560 | -0.2 |
| Moupinamide                                                                                                                                                                                 | 2.28E+04 | 4.96 | [M - H] <sup>-</sup>                    | C <sub>18</sub> H <sub>19</sub> NO <sub>4</sub> | 312.1246 | 1.4  |
| Torachrysone 8-O-Glucoside                                                                                                                                                                  | 1.24E+05 | 5.04 | [M - H] <sup>-</sup>                    | C <sub>20</sub> H <sub>24</sub> O <sub>9</sub>  | 407.1360 | 3    |
| Emodin-8-glucoside                                                                                                                                                                          | 1.11E+06 | 5.06 | [M - H] <sup>-</sup>                    | C <sub>21</sub> H <sub>20</sub> O <sub>10</sub> | 431.0990 | 1.5  |
| 9,10-Anthracenedione,<br>1,2,3-trihydroxy-8-methoxy-6-methyl-<br>Physcion 8-beta-D-glucoside                                                                                                | 4.73E+03 | 5.46 | [M - H] <sup>-</sup>                    | C <sub>16</sub> H <sub>12</sub> O <sub>6</sub>  | 299.0575 | 4.3  |
| 5-Heptenoic acid,<br>7-[(1S,3R,4S,5S)-3-[(1E,3S)-3-hydroxy-1-octen-1-yl]-2,<br>6-dioxabicyclo[3.1.1]hept-4-yl]-, (5Z)-                                                                      | 1.59E+04 | 5.72 | [M + H] <sup>+</sup>                    | C <sub>20</sub> H <sub>32</sub> O <sub>5</sub>  | 353.2312 | -3   |
| Methyl 4,5-didehydrojasmonate                                                                                                                                                               | 1.03E+04 | 6.10 | [M - H] <sup>-</sup>                    | C <sub>13</sub> H <sub>18</sub> O <sub>3</sub>  | 221.1185 | 0.9  |
| emodin                                                                                                                                                                                      | 1.75E+05 | 7.19 | [M + H] <sup>+</sup>                    | C <sub>15</sub> H <sub>10</sub> O <sub>5</sub>  | 271.0600 | -0.7 |
| 1,6-dihydroxy-8-methoxy-3-methylanthracene-9,10-<br>dione                                                                                                                                   | 1.98E+04 | 8.39 | [M - H] <sup>-</sup>                    | C <sub>16</sub> H <sub>12</sub> O <sub>5</sub>  | 283.0625 | 0.3  |
| 9,12-Octadecadienoic Acid                                                                                                                                                                   | 9.45E+04 | 9.77 | [M - H] <sup>-</sup>                    | C <sub>18</sub> H <sub>32</sub> O <sub>2</sub>  | 279.2335 | 2    |

Table S2. Compounds assigned in extract of RPM.

| Component Name                                                          | Area     | RT (min) | Adduct / Charge                         | Formula                                        | Precursor Mass | Mass Error (ppm) |
|-------------------------------------------------------------------------|----------|----------|-----------------------------------------|------------------------------------------------|----------------|------------------|
| 5,6,7,8-Tetrahydroxy-2-(4-hydroxy-3,5-dimethoxyph<br>enyl)chromen-4-one | 1.72E+06 | 0.57     | [M + H <sub>2</sub> O + H] <sup>+</sup> | C <sub>17</sub> H <sub>14</sub> O <sub>9</sub> | 381.0793       | -4.4             |
| Butanedioic Acid                                                        | 6.98E+03 | 0.60     | [M + H <sub>3</sub> N + H] <sup>+</sup> | C <sub>4</sub> H <sub>6</sub> O <sub>4</sub>   | 136.0617       | -3.2             |
| (-)-Catechin                                                            | 7.01E+04 | 3.45     | [M - H] <sup>-</sup>                    | C <sub>15</sub> H <sub>14</sub> O <sub>6</sub> | 289.0720       | 0.8              |

|                                                                                                                      |          |      |                                         |                                                 |          |      |
|----------------------------------------------------------------------------------------------------------------------|----------|------|-----------------------------------------|-------------------------------------------------|----------|------|
| Mulberroside A                                                                                                       | 1.26E+04 | 3.59 | [M - H <sub>2</sub> O + H] <sup>+</sup> | C <sub>26</sub> H <sub>32</sub> O <sub>14</sub> | 551.1749 | -2   |
| 2,5-Bis(Beta-D-Glucopyranosyloxy)-3,4'-Dihydroxystilbene                                                             | 1.82E+03 | 3.64 | [M - H] <sup>-</sup>                    | C <sub>26</sub> H <sub>32</sub> O <sub>14</sub> | 567.1723 | 0.4  |
| 3-(Hydroxymethyl)tyrosine                                                                                            | 4.31E+01 | 3.70 | [M - H] <sup>-</sup>                    | C <sub>10</sub> H <sub>13</sub> NO <sub>4</sub> | 210.0769 | -1.8 |
| D-Glucose,                                                                                                           |          |      |                                         |                                                 |          |      |
| 2-O-[2,4-dihydroxy-6-[2-(4-hydroxyphenyl)ethenyl]phenyl]-                                                            | 1.35E+03 | 3.90 | [M - H] <sup>-</sup>                    | C <sub>20</sub> H <sub>22</sub> O <sub>9</sub>  | 405.1187 | -0.9 |
| 3-acetyl-7-methoxy-2-methyl-5-[(2S,3R,4S,5S,6R)-3,4,5-trihydroxy-6-(hydroxymethyl)oxan-2-yl]oxynaphthalene-1,4-dione | 1.42E+04 | 3.94 | [M-H] <sup>-</sup>                      | C <sub>20</sub> H <sub>22</sub> O <sub>10</sub> | 421.1145 | 1.1  |
| 3-Pyrrolidineacetic acid,                                                                                            |          |      |                                         |                                                 |          |      |
| 2-carboxy-4-(1-methylethenyl)-                                                                                       | 3.92E+03 | 4.03 | [M - H] <sup>-</sup>                    | C <sub>10</sub> H <sub>15</sub> NO <sub>4</sub> | 212.0932 | 0.8  |
| 5-(4-Hydroxyphenyl)peroxybenzene-1,3-diol                                                                            | 4.89E+03 | 4.13 | [M - H] <sup>-</sup>                    | C <sub>12</sub> H <sub>10</sub> O <sub>5</sub>  | 233.0460 | 1.5  |
| 2-Methoxystypannone                                                                                                  | 7.87E+03 | 4.19 | [M - H] <sup>-</sup>                    | C <sub>14</sub> H <sub>12</sub> O <sub>5</sub>  | 259.0621 | 3.5  |
| 2,3,5,4'-Tetrahydroxystilbene 2-O-Beta-D-Glucoside                                                                   | 1.69E+06 | 4.20 | [M + H] <sup>+</sup>                    | C <sub>20</sub> H <sub>22</sub> O <sub>9</sub>  | 407.1334 | -0.9 |
| 2,3,5,4''-Tetrahydroxystilbene 2-O-glucopyranoside                                                                   | 8.04E+06 | 4.20 | [M-H] <sup>-</sup>                      | C <sub>20</sub> H <sub>22</sub> O <sub>9</sub>  | 405.1190 | -0.3 |
| Astringenin;trans-Piceatannol                                                                                        | 2.32E+04 | 4.20 | [M - H] <sup>-</sup>                    | C <sub>14</sub> H <sub>12</sub> O <sub>4</sub>  | 243.0667 | 1.3  |
| Flavosativaside                                                                                                      | 1.73E+04 | 4.67 | [M - H] <sup>-</sup>                    | C <sub>27</sub> H <sub>30</sub> O <sub>15</sub> | 593.1503 | -1.4 |
| 7-hydroxy-4,5-dimethylchromen-2-one                                                                                  | 9.08E+03 | 4.87 | [M - H] <sup>-</sup>                    | C <sub>11</sub> H <sub>10</sub> O <sub>3</sub>  | 189.0560 | -0.2 |
| Moupinamide                                                                                                          | 1.94E+04 | 4.96 | [M - H] <sup>-</sup>                    | C <sub>18</sub> H <sub>19</sub> NO <sub>4</sub> | 312.1246 | 1.4  |
| Torachrysone 8-O-Glucoside                                                                                           | 1.56E+05 | 5.04 | [M - H] <sup>-</sup>                    | C <sub>20</sub> H <sub>24</sub> O <sub>9</sub>  | 407.1360 | 3    |
| Emodin-8-glucoside                                                                                                   | 2.19E+03 | 5.06 | [M - H] <sup>-</sup>                    | C <sub>21</sub> H <sub>20</sub> O <sub>10</sub> | 431.0990 | 1.5  |
| 9,10-Anthracenedione,                                                                                                |          |      |                                         |                                                 |          |      |
| 1,2,3-trihydroxy-8-methoxy-6-methyl-5-Heptenoic acid,                                                                | 3.54E+03 | 5.46 | [M - H] <sup>-</sup>                    | C <sub>16</sub> H <sub>12</sub> O <sub>6</sub>  | 299.0575 | 4.3  |
| 7-[(1S,3R,4S,5S)-3-[(1E,3S)-3-hydroxy-1-octen-1-yl]-2,6-dioxabicyclo[3.1.1]hept-4-yl]-, (5Z)-                        | 3.01E+04 | 5.72 | [M + H] <sup>+</sup>                    | C <sub>20</sub> H <sub>32</sub> O <sub>5</sub>  | 353.2312 | -3   |
| Methyl 4,5-didehydrojasmonate                                                                                        | 1.16E+04 | 6.10 | [M - H] <sup>-</sup>                    | C <sub>13</sub> H <sub>18</sub> O <sub>3</sub>  | 221.1185 | 0.9  |
| emodin                                                                                                               | 2.39E+05 | 7.19 | [M + H] <sup>+</sup>                    | C <sub>15</sub> H <sub>10</sub> O <sub>5</sub>  | 271.0600 | -0.7 |
| 1,6-dihydroxy-8-methoxy-3-methylanthracene-9,10-dione                                                                | 1.08E+04 | 8.39 | [M - H] <sup>-</sup>                    | C <sub>16</sub> H <sub>12</sub> O <sub>5</sub>  | 283.0625 | 0.3  |
| 9,12-Octadecadienoic Acid                                                                                            | 2.39E+05 | 9.77 | [M - H] <sup>-</sup>                    | C <sub>18</sub> H <sub>32</sub> O <sub>2</sub>  | 279.2335 | 2    |
